# Supplementary material for: Centromere Interactions Promote the Maintenance of the Multipartite Genome in Agrobacterium tumefaciens
Source: PubMed Central journal article supplement (PMC9239152; doi:10.1128/mbio.00508-22), 2022-05-10

Ren Figure S4

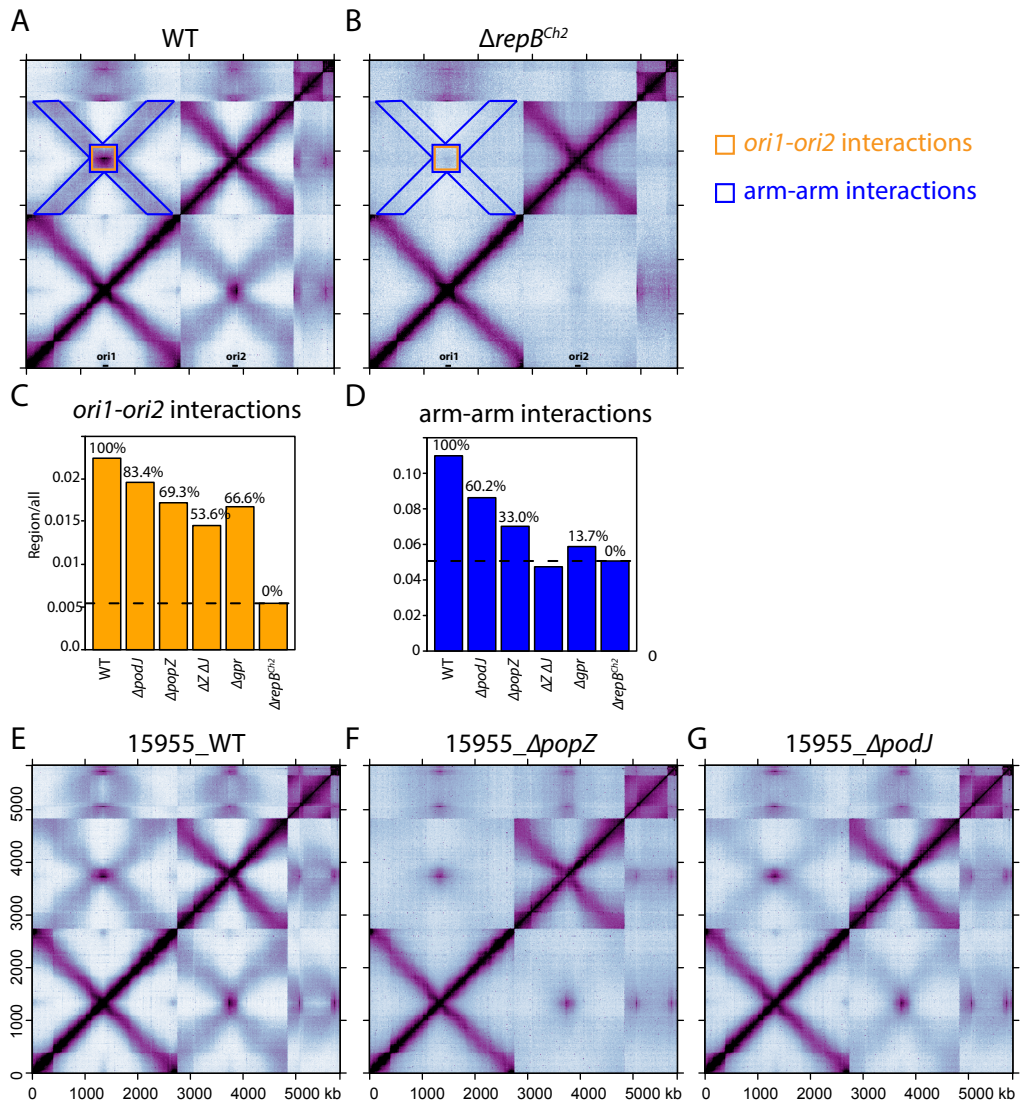

Supplement: mbio.00508-22-s0005.pdf [file mbio.00508-22-s0005.pdf]
